# Supplementary material for: Intravital imaging by simultaneous label-free autofluorescence-multiharmonic microscopy
Source: PubMed Central journal article supplement (PMC5974075; doi:10.1038/s41467-018-04470-8), 2018-05-29
Supplement: 41467_2018_4470_MOESM3_ESM.pdf [file 41467_2018_4470_MOESM3_ESM.pdf]

## Description of Additional Supplementary Files

File Name: Supplementary Movie 1

Description: Volumetric image stack from 40  $\mu\text{m}$  to 115  $\mu\text{m}$  below the surface. Recording frame rate: 0.5 f.p.s. Playback at 30 f.p.s. Data correspond to Fig. 2f-h.

File Name: Supplementary Movie 2

Description: Neutrophil slow rolling along the vessel wall. Recording duration: 15 min. Recording frame rate: 0.5 f.p.s. Playback at 30 f.p.s. Data correspond to Fig. 3a.

File Name: Supplementary Movie 3

Description: Leukocyte adhering to and crawling along the vessel wall. Recording duration: 27 min. Recording frame rate: 0.5 f.p.s. Playback at 30 f.p.s. Data correspond to Fig. 3b.

File Name: Supplementary Movie 4

Description: Leukocyte swarming (raw data). Recording duration: 70 min. Recording frame rate: 0.5 f.p.s. Playback at 100 f.p.s. Data correspond to Fig. 4.

File Name: Supplementary Movie 5

Description: Leukocyte swarming with traces (after smoothing). Recording duration: 70 min. Recording frame rate: 0.5 f.p.s. Playback at 100 f.p.s. Data correspond to Fig. 4
